# Supplementary material
Source: publisher figshare collection journal article supplement (https://acs.figshare.com/ndownloader/files/4379482)
Supplement: Supplementary file 1 [file 4379482]

 
data_c2c-mps 
 
_audit_creation_method            'Bruker SHELXTL'
_chemical_name_systematic 
; 
 ? 
; 
_chemical_name_common             ? 
_chemical_melting_point           ? 
_chemical_formula_moiety          'C30 H 24 N6 Ru, C60, C7 H8, 2 (C7 H5 N), C7'  
_chemical_formula_sum 
 'C118 H42 N8 Ru' 
_chemical_formula_weight          1672.67 
 
loop_ 
 _atom_type_symbol 
 _atom_type_description 
 _atom_type_scat_dispersion_real 
 _atom_type_scat_dispersion_imag 
 _atom_type_scat_source 
 'C'  'C'   0.0033   0.0016 
 'International Tables Vol C Tables 4.2.6.8 and 6.1.1.4' 
 'H'  'H'   0.0000   0.0000 
 'International Tables Vol C Tables 4.2.6.8 and 6.1.1.4' 
 'N'  'N'   0.0061   0.0033 
 'International Tables Vol C Tables 4.2.6.8 and 6.1.1.4' 
 'Ru'  'Ru'  -1.2594   0.8363 
 'International Tables Vol C Tables 4.2.6.8 and 6.1.1.4' 
 
_symmetry_cell_setting            Monoclinic 
_symmetry_space_group_name_H-M    'C 2/c' 
_symmetry_space_group_name_Hall    '-C 2yc'
 
loop_ 
 _symmetry_equiv_pos_as_xyz 
 'x, y, z' 
 '-x, y, -z+1/2' 
 'x+1/2, y+1/2, z' 
 '-x+1/2, y+1/2, -z+1/2' 
 '-x, -y, -z' 
 'x, -y, z-1/2' 
 '-x+1/2, -y+1/2, -z' 
 'x+1/2, -y+1/2, z-1/2' 
 
_cell_length_a                    10.914(2) 
_cell_length_b                    40.612(8) 
_cell_length_c                    17.303(4) 
_cell_angle_alpha                 90.00 
_cell_angle_beta                  101.17(3) 
_cell_angle_gamma                 90.00 
_cell_volume                      7524(3) 
_cell_formula_units_Z             4 
_cell_measurement_temperature     100(2) 
_cell_measurement_reflns_used     9850 
_cell_measurement_theta_min       2.34 
_cell_measurement_theta_max       32.74 
 
_exptl_crystal_description        'block' 
_exptl_crystal_colour             red
_exptl_crystal_size_max           0.68 
_exptl_crystal_size_mid           0.16 
_exptl_crystal_size_min           0.09 
_exptl_crystal_density_meas       'not measured'
_exptl_crystal_density_diffrn     1.477 
_exptl_crystal_density_method     'not measured' 
_exptl_crystal_F_000              3400 
_exptl_absorpt_coefficient_mu     0.275 
_exptl_absorpt_correction_type    multi-scan 
_exptl_absorpt_correction_T_min   0.834 
_exptl_absorpt_correction_T_max   0.9746 
_exptl_absorpt_process_details     
'Sheldrick, G. M. (2008) SADABS. University of G\"ottingen, Germany.' 
 
_exptl_special_details 
; 
 ? 
; 
 
_diffrn_ambient_temperature       100(2) 
_diffrn_radiation_wavelength      0.71073 
_diffrn_radiation_type            MoK\a 
_diffrn_radiation_source          'fine-focus sealed tube' 
_diffrn_radiation_monochromator   graphite 
_diffrn_reflns_number             31711 
_diffrn_reflns_av_R_equivalents   0.0357 
_diffrn_reflns_av_sigmaI/netI     0.0491 
_diffrn_reflns_limit_h_min        -14 
_diffrn_reflns_limit_h_max        8 
_diffrn_reflns_limit_k_min        -54 
_diffrn_reflns_limit_k_max        53 
_diffrn_reflns_limit_l_min        -19 
_diffrn_reflns_limit_l_max        22 
_diffrn_reflns_theta_min          1.56 
_diffrn_reflns_theta_max          28.28 
_reflns_number_total              8743 
_reflns_number_gt                 6801 
_reflns_threshold_expression      >2sigma(I) 
 
_computing_data_collection        'APEX2 (Bruker, 2009)' 
_computing_cell_refinement        'APEX2 (Bruker, 2009)' 
_computing_data_reduction         'APEX2 (Bruker, 2009)'
_computing_structure_solution     'XS (Sheldrick, 2008)' 
_computing_structure_refinement   'XL (Sheldrick, 2008)' 
_computing_molecular_graphics     'APEX2 (Bruker, 2009)'
_computing_publication_material   'APEX2 (Bruker, 2009)' 
 
_refine_special_details 
; 
 Refinement of F^2^ against ALL reflections.  The weighted R-factor wR and 
 goodness of fit S are based on F^2^, conventional R-factors R are based 
 on F, with F set to zero for negative F^2^. The threshold expression of 
 F^2^ > 2sigma(F^2^) is used only for calculating R-factors(gt) etc. and is 
 not relevant to the choice of reflections for refinement.  R-factors based 
 on F^2^ are statistically about twice as large as those based on F, and R- 
 factors based on ALL data will be even larger. 
; 
 
_refine_ls_structure_factor_coef  Fsqd  
_refine_ls_matrix_type            full 
_refine_ls_weighting_scheme       calc  
_refine_ls_weighting_details 
 'calc w=1/[\s^2^(Fo^2^)+(0.0785P)^2^+17.0849P] where P=(Fo^2^+2Fc^2^)/3' 
_atom_sites_solution_primary      patterson 
_atom_sites_solution_secondary    difmap 
_atom_sites_solution_hydrogens    geom 
_refine_ls_hydrogen_treatment     constr 
_refine_ls_extinction_method      none 
_refine_ls_extinction_coef        ? 
_refine_ls_number_reflns          8743 
_refine_ls_number_parameters      561 
_refine_ls_number_restraints      0 
_refine_ls_R_factor_all           0.0768 
_refine_ls_R_factor_gt            0.0548 
_refine_ls_wR_factor_ref          0.1530 
_refine_ls_wR_factor_gt           0.1371 
_refine_ls_goodness_of_fit_ref    1.045 
_refine_ls_restrained_S_all       1.045 
_refine_ls_shift/su_max           0.003 
_refine_ls_shift/su_mean          0.000 
 
loop_ 
 _atom_site_label 
 _atom_site_type_symbol 
 _atom_site_fract_x 
 _atom_site_fract_y 
 _atom_site_fract_z 
 _atom_site_U_iso_or_equiv 
 _atom_site_adp_type 
 _atom_site_occupancy 
 _atom_site_symmetry_multiplicity 
 _atom_site_calc_flag 
 _atom_site_refinement_flags 
 _atom_site_disorder_assembly 
 _atom_site_disorder_group 
Ru1 Ru 0.5000 0.623977(8) 0.7500 0.01959(11) Uani 1 2 d S . . 
N1 N 0.6114(2) 0.66310(6) 0.79502(14) 0.0202(5) Uani 1 1 d . . . 
C1 C 0.7226(3) 0.66102(8) 0.84427(19) 0.0281(7) Uani 1 1 d . . . 
H1 H 0.7566 0.6403 0.8571 0.034 Uiso 1 1 calc R . . 
N2 N 0.5500(2) 0.62169(6) 0.64255(15) 0.0227(5) Uani 1 1 d . . . 
C2 C 0.7886(3) 0.68834(8) 0.8768(2) 0.0327(7) Uani 1 1 d . . . 
H2 H 0.8651 0.6860 0.9110 0.039 Uiso 1 1 calc R . . 
N3 N 0.3849(2) 0.58678(6) 0.69799(15) 0.0238(5) Uani 1 1 d . . . 
C3 C 0.7388(3) 0.71926(8) 0.8574(2) 0.0358(8) Uani 1 1 d . . . 
H3 H 0.7816 0.7381 0.8779 0.043 Uiso 1 1 calc R . . 
N4 N 1.2325(6) 0.71074(14) 0.8360(3) 0.1039(19) Uani 1 1 d . . . 
C4 C 0.6239(3) 0.72168(8) 0.8068(2) 0.0310(7) Uani 1 1 d . . . 
H4 H 0.5889 0.7422 0.7931 0.037 Uiso 1 1 calc R . . 
C5 C 0.5618(3) 0.69346(7) 0.77693(18) 0.0239(6) Uani 1 1 d . . . 
C6 C 0.6314(3) 0.64181(8) 0.61694(19) 0.0298(7) Uani 1 1 d . . . 
H6 H 0.6739 0.6573 0.6516 0.036 Uiso 1 1 calc R . . 
C7 C 0.6548(3) 0.64047(10) 0.5413(2) 0.0384(8) Uani 1 1 d . . . 
H7 H 0.7107 0.6550 0.5252 0.046 Uiso 1 1 calc R . . 
C8 C 0.5939(3) 0.61716(10) 0.4904(2) 0.0412(9) Uani 1 1 d . . . 
H8 H 0.6085 0.6156 0.4393 0.049 Uiso 1 1 calc R . . 
C9 C 0.5104(3) 0.59603(9) 0.51594(19) 0.0339(8) Uani 1 1 d . . . 
H9 H 0.4694 0.5800 0.4823 0.041 Uiso 1 1 calc R . . 
C10 C 0.4884(3) 0.59889(7) 0.59148(17) 0.0238(6) Uani 1 1 d . . . 
C11 C 0.3977(3) 0.57857(7) 0.62373(17) 0.0242(6) Uani 1 1 d . . . 
C12 C 0.3304(3) 0.55302(7) 0.58278(19) 0.0317(7) Uani 1 1 d . . . 
H12 H 0.3391 0.5481 0.5316 0.038 Uiso 1 1 calc R . . 
C13 C 0.2503(4) 0.53489(8) 0.6185(2) 0.0401(9) Uani 1 1 d . . . 
H13 H 0.2044 0.5177 0.5917 0.048 Uiso 1 1 calc R . . 
C14 C 0.2390(4) 0.54253(9) 0.6943(2) 0.0444(10) Uani 1 1 d . . . 
H14 H 0.1864 0.5304 0.7198 0.053 Uiso 1 1 calc R . . 
C15 C 0.3074(3) 0.56873(8) 0.7320(2) 0.0370(8) Uani 1 1 d . . . 
H15 H 0.2991 0.5740 0.7830 0.044 Uiso 1 1 calc R . . 
C16 C 0.6856(3) 0.62854(9) 0.1641(2) 0.0325(7) Uani 1 1 d . . . 
C17 C 0.6865(3) 0.59269(9) 0.1646(2) 0.0362(8) Uani 1 1 d . . . 
C18 C 0.7537(3) 0.58170(8) 0.10400(18) 0.0312(7) Uani 1 1 d . . . 
C19 C 0.7921(3) 0.61066(8) 0.06581(18) 0.0284(7) Uani 1 1 d . . . 
C20 C 0.7515(3) 0.63946(8) 0.10332(18) 0.0284(7) Uani 1 1 d . . . 
C21 C 0.8281(3) 0.66720(8) 0.11528(19) 0.0298(7) Uani 1 1 d . . . 
C22 C 0.8421(3) 0.68526(7) 0.18888(19) 0.0304(7) Uani 1 1 d . . . 
C23 C 0.7778(3) 0.67469(8) 0.2476(2) 0.0324(7) Uani 1 1 d . . . 
C24 C 0.6986(3) 0.64613(9) 0.2350(2) 0.0341(8) Uani 1 1 d . . . 
C25 C 0.7132(3) 0.62782(9) 0.3087(2) 0.0348(8) Uani 1 1 d . . . 
C26 C 0.8012(3) 0.64556(9) 0.3679(2) 0.0346(8) Uani 1 1 d . . . 
C27 C 0.8421(3) 0.67437(8) 0.3296(2) 0.0347(8) Uani 1 1 d . . . 
C28 C 0.7133(3) 0.59343(10) 0.3088(2) 0.0375(8) Uani 1 1 d . . . 
C29 C 0.6996(3) 0.57496(9) 0.2351(2) 0.0417(9) Uani 1 1 d . . . 
C30 C 0.7787(4) 0.54662(9) 0.2477(2) 0.0411(9) Uani 1 1 d . . . 
C31 C 0.8431(4) 0.53585(8) 0.1893(2) 0.0409(9) Uani 1 1 d . . . 
C32 C 0.9695(4) 0.52499(8) 0.2106(2) 0.0447(10) Uani 1 1 d . . . 
C33 C 1.0360(4) 0.53617(8) 0.1497(2) 0.0434(10) Uani 1 1 d . . . 
C34 C 0.9477(4) 0.55397(8) 0.0910(2) 0.0380(8) Uani 1 1 d . . . 
C35 C 0.8300(3) 0.55398(8) 0.1160(2) 0.0367(8) Uani 1 1 d . . . 
C36 C 1.1575(4) 0.54669(9) 0.1701(2) 0.0430(9) Uani 1 1 d . . . 
C37 C 1.1984(4) 0.57568(9) 0.1323(2) 0.0403(9) Uani 1 1 d . . . 
C38 C 1.1149(3) 0.59295(9) 0.07588(19) 0.0362(8) Uani 1 1 d . . . 
C39 C 0.9859(3) 0.58183(9) 0.05454(19) 0.0364(8) Uani 1 1 d . . . 
C40 C 1.1145(3) 0.62841(9) 0.07572(19) 0.0329(7) Uani 1 1 d . . . 
C41 C 0.9857(3) 0.63935(9) 0.05409(18) 0.0319(7) Uani 1 1 d . . . 
C42 C 0.9066(3) 0.61072(8) 0.04126(17) 0.0292(7) Uani 1 1 d . . . 
C43 C 0.9468(3) 0.66727(8) 0.09086(19) 0.0308(7) Uani 1 1 d . . . 
C44 C 1.0348(3) 0.68502(8) 0.1502(2) 0.0329(7) Uani 1 1 d . . . 
C45 C 0.9700(3) 0.69591(7) 0.21033(19) 0.0288(7) Uani 1 1 d . . . 
C46 C 1.1064(3) 0.74789(9) 0.9078(2) 0.0390(8) Uani 1 1 d . . . 
C47 C 1.0662(3) 0.77886(9) 0.8767(2) 0.0391(8) Uani 1 1 d . . . 
H47 H 1.0892 0.7867 0.8310 0.047 Uiso 1 1 calc R . . 
C48 C 0.9912(3) 0.79740(9) 0.9161(2) 0.0447(9) Uani 1 1 d . . . 
H48 H 0.9623 0.8178 0.8958 0.054 Uiso 1 1 calc R . . 
C49 C 0.9586(4) 0.78651(10) 0.9841(3) 0.0500(10) Uani 1 1 d . . . 
H49 H 0.9095 0.7996 1.0101 0.060 Uiso 1 1 calc R . . 
C50 C 0.9988(4) 0.75597(10) 1.0142(3) 0.0500(10) Uani 1 1 d . . . 
H50 H 0.9760 0.7484 1.0602 0.060 Uiso 1 1 calc R . . 
C51 C 1.0732(3) 0.73662(9) 0.9759(2) 0.0405(9) Uani 1 1 d . . . 
H51 H 1.1004 0.7161 0.9961 0.049 Uiso 1 1 calc R . . 
C52 C 1.1797(5) 0.72801(11) 0.8685(3) 0.0589(12) Uani 1 1 d . . . 
C53 C 0.4447(5) 0.50478(12) 0.4217(4) 0.0734(16) Uani 1 1 d . . . 
H53 H 0.4058 0.5074 0.3693 0.088 Uiso 1 1 calc R . . 
C54 C 0.5542(5) 0.52017(13) 0.4464(4) 0.095(2) Uani 1 1 d . A . 
H54 H 0.5905 0.5334 0.4131 0.114 Uiso 1 1 calc R . . 
C55 C 0.6142(4) 0.51480(10) 0.5309(3) 0.0644(14) Uani 1 1 d . . . 
H55 H 0.6906 0.5246 0.5515 0.077 Uiso 0.50 1 calc PR A 1 
C56 C 0.7362(4) 0.53173(10) 0.5590(3) 0.077(3) Uiso 0.50 1 d PR A 2 
H56A H 0.7570 0.5308 0.6154 0.116 Uiso 0.50 1 calc PR A 2 
H56B H 0.7298 0.5543 0.5422 0.116 Uiso 0.50 1 calc PR A 2 
H56C H 0.8002 0.5210 0.5373 0.116 Uiso 0.50 1 calc PR A 2 
C57 C 1.0000 0.65101(19) 0.7500 0.0701(19) Uiso 1 2 d S . . 
C58 C 0.9577(9) 0.6397(3) 0.6715(6) 0.057(3) Uiso 0.50 1 d P . . 
C59 C 0.9798(6) 0.58962(16) 0.7103(4) 0.0877(17) Uiso 1 1 d . . . 
C60 C 0.9579(9) 0.6070(3) 0.6570(6) 0.061(2) Uiso 0.50 1 d P . . 
C61 C 0.9160(9) 0.5706(2) 0.6373(6) 0.061(2) Uiso 0.50 1 d P . . 
C62 C 0.9667(9) 0.6270(3) 0.6894(6) 0.051(2) Uiso 0.50 1 d P . . 
 
loop_ 
 _atom_site_aniso_label 
 _atom_site_aniso_U_11 
 _atom_site_aniso_U_22 
 _atom_site_aniso_U_33 
 _atom_site_aniso_U_23 
 _atom_site_aniso_U_13 
 _atom_site_aniso_U_12 
Ru1 0.02354(17) 0.01540(16) 0.02076(18) 0.000 0.00659(12) 0.000 
N1 0.0212(11) 0.0162(11) 0.0235(13) 0.0010(9) 0.0047(9) -0.0006(9) 
C1 0.0252(15) 0.0241(15) 0.0348(18) 0.0022(13) 0.0055(13) 0.0005(12) 
N2 0.0240(11) 0.0171(11) 0.0265(13) 0.0028(10) 0.0034(10) 0.0027(9) 
C2 0.0267(15) 0.0338(17) 0.0347(18) -0.0024(14) -0.0011(13) -0.0009(13) 
N3 0.0318(13) 0.0163(11) 0.0242(13) 0.0020(10) 0.0075(10) -0.0022(10) 
C3 0.0387(18) 0.0252(16) 0.041(2) -0.0065(14) 0.0022(15) -0.0064(14) 
N4 0.131(5) 0.097(4) 0.097(4) 0.022(3) 0.053(4) 0.051(4) 
C4 0.0362(17) 0.0195(14) 0.0357(18) -0.0013(13) 0.0028(14) -0.0001(12) 
C5 0.0268(14) 0.0201(14) 0.0255(16) 0.0002(12) 0.0070(12) -0.0009(11) 
C6 0.0289(15) 0.0313(17) 0.0307(18) 0.0038(14) 0.0095(13) -0.0017(13) 
C7 0.0318(17) 0.053(2) 0.0319(19) 0.0060(16) 0.0096(14) -0.0022(16) 
C8 0.0318(17) 0.070(3) 0.0228(18) 0.0040(17) 0.0072(14) -0.0032(16) 
C9 0.0285(16) 0.045(2) 0.0256(17) -0.0022(15) -0.0002(13) 0.0007(14) 
C10 0.0269(14) 0.0234(14) 0.0209(15) 0.0024(12) 0.0038(12) 0.0060(11) 
C11 0.0321(15) 0.0158(13) 0.0235(15) 0.0018(11) 0.0019(12) 0.0031(11) 
C12 0.0496(19) 0.0208(14) 0.0229(16) 0.0011(12) 0.0028(14) 0.0003(14) 
C13 0.061(2) 0.0242(16) 0.0318(19) -0.0021(14) 0.0022(17) -0.0154(16) 
C14 0.069(3) 0.0310(18) 0.034(2) 0.0025(15) 0.0112(18) -0.0243(18) 
C15 0.053(2) 0.0335(18) 0.0273(17) -0.0009(14) 0.0146(16) -0.0163(16) 
C16 0.0247(15) 0.0417(19) 0.0293(17) -0.0009(14) 0.0004(13) -0.0005(13) 
C17 0.0320(17) 0.0416(19) 0.0314(18) 0.0012(15) -0.0030(14) -0.0121(15) 
C18 0.0364(17) 0.0318(16) 0.0222(16) -0.0042(13) -0.0021(13) -0.0086(14) 
C19 0.0327(16) 0.0298(16) 0.0202(15) -0.0011(12) -0.0008(13) 0.0009(13) 
C20 0.0293(15) 0.0309(16) 0.0230(16) 0.0017(13) 0.0001(13) 0.0041(13) 
C21 0.0331(16) 0.0249(15) 0.0293(17) 0.0074(13) 0.0006(13) 0.0057(13) 
C22 0.0380(17) 0.0167(13) 0.0344(18) 0.0020(12) 0.0020(14) 0.0073(12) 
C23 0.0307(16) 0.0284(16) 0.0378(19) -0.0059(14) 0.0058(14) 0.0097(13) 
C24 0.0270(16) 0.0418(19) 0.0336(19) -0.0010(15) 0.0059(14) 0.0045(14) 
C25 0.0291(16) 0.051(2) 0.0269(17) 0.0004(15) 0.0114(13) -0.0020(15) 
C26 0.0342(17) 0.043(2) 0.0305(18) -0.0074(15) 0.0152(14) 0.0005(14) 
C27 0.0386(18) 0.0330(17) 0.0339(19) -0.0102(14) 0.0109(15) 0.0110(14) 
C28 0.0333(17) 0.053(2) 0.0281(18) -0.0013(16) 0.0115(14) -0.0165(16) 
C29 0.044(2) 0.047(2) 0.0328(19) 0.0007(16) 0.0029(16) -0.0241(17) 
C30 0.055(2) 0.0285(17) 0.037(2) 0.0038(15) 0.0026(17) -0.0197(16) 
C31 0.062(2) 0.0175(15) 0.037(2) -0.0017(14) -0.0042(18) -0.0126(15) 
C32 0.073(3) 0.0146(14) 0.040(2) -0.0037(14) -0.0049(19) 0.0000(16) 
C33 0.069(3) 0.0219(16) 0.035(2) -0.0115(14) -0.0004(18) 0.0114(16) 
C34 0.056(2) 0.0274(17) 0.0274(18) -0.0103(14) 0.0008(16) 0.0059(15) 
C35 0.051(2) 0.0224(15) 0.0310(18) -0.0077(13) -0.0061(15) -0.0062(14) 
C36 0.064(2) 0.0309(18) 0.033(2) -0.0076(15) 0.0063(18) 0.0200(17) 
C37 0.049(2) 0.043(2) 0.0311(19) -0.0074(16) 0.0130(16) 0.0177(17) 
C38 0.048(2) 0.046(2) 0.0179(16) -0.0047(14) 0.0135(14) 0.0093(16) 
C39 0.052(2) 0.0376(19) 0.0187(16) -0.0092(14) 0.0037(15) 0.0072(16) 
C40 0.0382(17) 0.043(2) 0.0209(16) 0.0070(14) 0.0150(13) 0.0041(15) 
C41 0.0386(17) 0.0386(18) 0.0184(15) 0.0088(13) 0.0052(13) -0.0001(14) 
C42 0.0402(18) 0.0326(17) 0.0142(14) -0.0008(12) 0.0035(13) 0.0025(14) 
C43 0.0377(17) 0.0277(16) 0.0255(16) 0.0122(13) 0.0023(13) 0.0000(13) 
C44 0.0412(18) 0.0223(15) 0.0345(18) 0.0090(13) 0.0053(15) -0.0052(13) 
C45 0.0363(17) 0.0138(13) 0.0351(18) 0.0031(12) 0.0039(14) 0.0026(12) 
C46 0.0355(18) 0.0376(19) 0.042(2) -0.0020(16) 0.0026(15) 0.0017(15) 
C47 0.0355(18) 0.0341(18) 0.046(2) 0.0038(16) 0.0031(16) -0.0002(14) 
C48 0.0405(19) 0.038(2) 0.053(2) 0.0098(18) 0.0012(18) 0.0063(16) 
C49 0.051(2) 0.046(2) 0.053(3) -0.0029(19) 0.0111(19) 0.0102(18) 
C50 0.055(2) 0.051(2) 0.043(2) 0.0057(19) 0.0084(19) 0.0035(19) 
C51 0.048(2) 0.0309(18) 0.040(2) 0.0065(15) 0.0010(16) 0.0019(15) 
C52 0.072(3) 0.046(2) 0.061(3) 0.003(2) 0.019(2) 0.021(2) 
C53 0.065(3) 0.043(3) 0.103(4) -0.030(3) -0.007(3) 0.016(2) 
C54 0.067(3) 0.046(3) 0.162(6) -0.026(3) -0.001(4) 0.024(3) 
C55 0.050(2) 0.043(2) 0.091(4) -0.024(2) -0.008(2) 0.017(2) 
 
_geom_special_details 
; 
 All esds (except the esd in the dihedral angle between two l.s. planes) 
 are estimated using the full covariance matrix.  The cell esds are taken 
 into account individually in the estimation of esds in distances, angles 
 and torsion angles; correlations between esds in cell parameters are only 
 used when they are defined by crystal symmetry.  An approximate (isotropic) 
 treatment of cell esds is used for estimating esds involving l.s. planes. 
; 
 
loop_ 
 _geom_bond_atom_site_label_1 
 _geom_bond_atom_site_label_2 
 _geom_bond_distance 
 _geom_bond_site_symmetry_2 
 _geom_bond_publ_flag 
Ru1 N2 2.039(3) 2_656 ? 
Ru1 N2 2.039(3) . ? 
Ru1 N3 2.057(2) . ? 
Ru1 N3 2.057(2) 2_656 ? 
Ru1 N1 2.060(2) . ? 
Ru1 N1 2.060(2) 2_656 ? 
N1 C1 1.343(4) . ? 
N1 C5 1.359(4) . ? 
C1 C2 1.382(4) . ? 
N2 C6 1.343(4) . ? 
N2 C10 1.364(4) . ? 
C2 C3 1.384(5) . ? 
N3 C15 1.338(4) . ? 
N3 C11 1.361(4) . ? 
C3 C4 1.387(4) . ? 
N4 C52 1.125(6) . ? 
C4 C5 1.380(4) . ? 
C5 C5 1.483(6) 2_656 ? 
C6 C7 1.382(5) . ? 
C7 C8 1.374(5) . ? 
C8 C9 1.385(5) . ? 
C9 C10 1.379(5) . ? 
C10 C11 1.478(4) . ? 
C11 C12 1.385(4) . ? 
C12 C13 1.377(5) . ? 
C13 C14 1.377(5) . ? 
C14 C15 1.388(5) . ? 
C16 C24 1.403(5) . ? 
C16 C20 1.454(5) . ? 
C16 C17 1.456(5) . ? 
C17 C29 1.400(5) . ? 
C17 C18 1.461(5) . ? 
C18 C35 1.391(5) . ? 
C18 C19 1.450(5) . ? 
C19 C42 1.396(5) . ? 
C19 C20 1.448(5) . ? 
C20 C21 1.394(4) . ? 
C21 C43 1.438(5) . ? 
C21 C22 1.452(5) . ? 
C22 C23 1.409(5) . ? 
C22 C45 1.440(4) . ? 
C23 C24 1.438(5) . ? 
C23 C27 1.455(5) . ? 
C24 C25 1.457(5) . ? 
C25 C28 1.397(5) . ? 
C25 C26 1.453(5) . ? 
C26 C40 1.391(5) 2_755 ? 
C26 C27 1.457(5) . ? 
C27 C44 1.390(5) 2_755 ? 
C28 C37 1.452(5) 2_755 ? 
C28 C29 1.463(5) . ? 
C29 C30 1.430(6) . ? 
C30 C31 1.408(6) . ? 
C30 C36 1.458(5) 2_755 ? 
C31 C32 1.427(6) . ? 
C31 C35 1.450(5) . ? 
C32 C32 1.398(7) 2_755 ? 
C32 C33 1.462(6) . ? 
C33 C36 1.373(6) . ? 
C33 C34 1.450(5) . ? 
C34 C39 1.398(5) . ? 
C34 C35 1.432(6) . ? 
C36 C37 1.457(6) . ? 
C36 C30 1.458(5) 2_755 ? 
C37 C38 1.389(5) . ? 
C37 C28 1.452(5) 2_755 ? 
C38 C40 1.440(5) . ? 
C38 C39 1.457(5) . ? 
C39 C42 1.450(5) . ? 
C40 C26 1.391(5) 2_755 ? 
C40 C41 1.453(5) . ? 
C41 C43 1.405(5) . ? 
C41 C42 1.440(5) . ? 
C43 C44 1.455(5) . ? 
C44 C27 1.390(5) 2_755 ? 
C44 C45 1.436(5) . ? 
C45 C45 1.402(6) 2_755 ? 
C46 C51 1.377(5) . ? 
C46 C52 1.402(6) . ? 
C46 C47 1.404(5) . ? 
C47 C48 1.385(5) . ? 
C48 C49 1.368(6) . ? 
C49 C50 1.384(5) . ? 
C50 C51 1.388(6) . ? 
C53 C54 1.343(7) . ? 
C53 C55 1.386(7) 5_666 ? 
C54 C55 1.497(8) . ? 
C55 C53 1.386(8) 5_666 ? 
C55 C56 1.4936 . ? 
C57 C58 1.424(11) 2_756 ? 
C57 C58 1.424(11) . ? 
C57 C62 1.427(11) 2_756 ? 
C57 C62 1.427(11) . ? 
C58 C62 0.601(12) . ? 
C58 C60 1.351(14) . ? 
C59 C60 1.149(11) . ? 
C59 C59 1.361(12) 2_756 ? 
C59 C61 1.527(11) . ? 
C59 C62 1.561(12) . ? 
C60 C62 0.979(12) . ? 
C60 C61 1.565(14) . ? 
 
loop_ 
 _geom_angle_atom_site_label_1 
 _geom_angle_atom_site_label_2 
 _geom_angle_atom_site_label_3 
 _geom_angle 
 _geom_angle_site_symmetry_1 
 _geom_angle_site_symmetry_3 
 _geom_angle_publ_flag 
N2 Ru1 N2 174.79(13) 2_656 . ? 
N2 Ru1 N3 96.71(10) 2_656 . ? 
N2 Ru1 N3 79.42(10) . . ? 
N2 Ru1 N3 79.42(10) 2_656 2_656 ? 
N2 Ru1 N3 96.71(10) . 2_656 ? 
N3 Ru1 N3 85.52(14) . 2_656 ? 
N2 Ru1 N1 86.16(9) 2_656 . ? 
N2 Ru1 N1 97.88(10) . . ? 
N3 Ru1 N1 176.01(9) . . ? 
N3 Ru1 N1 97.76(10) 2_656 . ? 
N2 Ru1 N1 97.88(10) 2_656 2_656 ? 
N2 Ru1 N1 86.16(9) . 2_656 ? 
N3 Ru1 N1 97.76(9) . 2_656 ? 
N3 Ru1 N1 176.01(9) 2_656 2_656 ? 
N1 Ru1 N1 79.06(13) . 2_656 ? 
C1 N1 C5 118.3(2) . . ? 
C1 N1 Ru1 125.86(19) . . ? 
C5 N1 Ru1 115.64(18) . . ? 
N1 C1 C2 122.9(3) . . ? 
C6 N2 C10 118.3(3) . . ? 
C6 N2 Ru1 125.7(2) . . ? 
C10 N2 Ru1 115.8(2) . . ? 
C1 C2 C3 118.8(3) . . ? 
C15 N3 C11 118.0(3) . . ? 
C15 N3 Ru1 126.5(2) . . ? 
C11 N3 Ru1 115.3(2) . . ? 
C2 C3 C4 118.8(3) . . ? 
C5 C4 C3 119.8(3) . . ? 
N1 C5 C4 121.5(3) . . ? 
N1 C5 C5 114.73(15) . 2_656 ? 
C4 C5 C5 123.80(18) . 2_656 ? 
N2 C6 C7 122.9(3) . . ? 
C8 C7 C6 118.6(3) . . ? 
C7 C8 C9 119.3(3) . . ? 
C10 C9 C8 119.8(3) . . ? 
N2 C10 C9 121.1(3) . . ? 
N2 C10 C11 114.6(3) . . ? 
C9 C10 C11 124.3(3) . . ? 
N3 C11 C12 121.7(3) . . ? 
N3 C11 C10 114.7(2) . . ? 
C12 C11 C10 123.6(3) . . ? 
C13 C12 C11 119.4(3) . . ? 
C14 C13 C12 119.3(3) . . ? 
C13 C14 C15 118.7(3) . . ? 
N3 C15 C14 122.8(3) . . ? 
C24 C16 C20 119.8(3) . . ? 
C24 C16 C17 120.3(3) . . ? 
C20 C16 C17 107.8(3) . . ? 
C29 C17 C16 121.3(3) . . ? 
C29 C17 C18 119.2(3) . . ? 
C16 C17 C18 107.8(3) . . ? 
C35 C18 C19 120.5(3) . . ? 
C35 C18 C17 120.6(3) . . ? 
C19 C18 C17 108.0(3) . . ? 
C42 C19 C20 120.3(3) . . ? 
C42 C19 C18 119.6(3) . . ? 
C20 C19 C18 108.1(3) . . ? 
C21 C20 C19 119.5(3) . . ? 
C21 C20 C16 120.4(3) . . ? 
C19 C20 C16 108.3(3) . . ? 
C20 C21 C43 120.4(3) . . ? 
C20 C21 C22 119.8(3) . . ? 
C43 C21 C22 108.0(3) . . ? 
C23 C22 C45 120.0(3) . . ? 
C23 C22 C21 119.7(3) . . ? 
C45 C22 C21 108.1(3) . . ? 
C22 C23 C24 120.4(3) . . ? 
C22 C23 C27 119.5(3) . . ? 
C24 C23 C27 107.6(3) . . ? 
C16 C24 C23 119.9(3) . . ? 
C16 C24 C25 118.7(3) . . ? 
C23 C24 C25 108.5(3) . . ? 
C28 C25 C26 119.6(3) . . ? 
C28 C25 C24 120.8(3) . . ? 
C26 C25 C24 108.1(3) . . ? 
C40 C26 C25 120.2(3) 2_755 . ? 
C40 C26 C27 120.1(3) 2_755 . ? 
C25 C26 C27 107.2(3) . . ? 
C44 C27 C23 120.1(3) 2_755 . ? 
C44 C27 C26 120.1(3) 2_755 . ? 
C23 C27 C26 108.6(3) . . ? 
C25 C28 C37 119.9(3) . 2_755 ? 
C25 C28 C29 120.7(3) . . ? 
C37 C28 C29 107.4(3) 2_755 . ? 
C17 C29 C30 120.3(4) . . ? 
C17 C29 C28 118.2(3) . . ? 
C30 C29 C28 108.8(3) . . ? 
C31 C30 C29 120.7(3) . . ? 
C31 C30 C36 119.4(4) . 2_755 ? 
C29 C30 C36 107.9(3) . 2_755 ? 
C30 C31 C32 120.2(3) . . ? 
C30 C31 C35 119.5(3) . . ? 
C32 C31 C35 108.0(4) . . ? 
C32 C32 C31 120.4(5) 2_755 . ? 
C32 C32 C33 119.6(5) 2_755 . ? 
C31 C32 C33 107.9(3) . . ? 
C36 C33 C34 120.2(4) . . ? 
C36 C33 C32 120.1(3) . . ? 
C34 C33 C32 107.7(4) . . ? 
C39 C34 C35 119.9(3) . . ? 
C39 C34 C33 120.3(4) . . ? 
C35 C34 C33 107.6(3) . . ? 
C18 C35 C34 120.1(3) . . ? 
C18 C35 C31 119.7(4) . . ? 
C34 C35 C31 108.8(3) . . ? 
C33 C36 C37 120.0(3) . . ? 
C33 C36 C30 120.3(4) . 2_755 ? 
C37 C36 C30 108.0(3) . 2_755 ? 
C38 C37 C28 119.9(3) . 2_755 ? 
C38 C37 C36 120.5(4) . . ? 
C28 C37 C36 107.8(3) 2_755 . ? 
C37 C38 C40 120.5(3) . . ? 
C37 C38 C39 119.5(3) . . ? 
C40 C38 C39 107.9(3) . . ? 
C34 C39 C42 120.4(3) . . ? 
C34 C39 C38 119.6(3) . . ? 
C42 C39 C38 107.9(3) . . ? 
C26 C40 C38 119.9(3) 2_755 . ? 
C26 C40 C41 120.2(3) 2_755 . ? 
C38 C40 C41 108.0(3) . . ? 
C43 C41 C42 119.8(3) . . ? 
C43 C41 C40 119.5(3) . . ? 
C42 C41 C40 108.3(3) . . ? 
C19 C42 C41 120.0(3) . . ? 
C19 C42 C39 119.5(3) . . ? 
C41 C42 C39 107.9(3) . . ? 
C41 C43 C21 120.0(3) . . ? 
C41 C43 C44 120.2(3) . . ? 
C21 C43 C44 107.6(3) . . ? 
C27 C44 C45 120.1(3) 2_755 . ? 
C27 C44 C43 119.8(3) 2_755 . ? 
C45 C44 C43 108.3(3) . . ? 
C45 C45 C44 120.5(4) 2_755 . ? 
C45 C45 C22 119.8(4) 2_755 . ? 
C44 C45 C22 108.0(3) . . ? 
C51 C46 C52 119.6(4) . . ? 
C51 C46 C47 120.7(4) . . ? 
C52 C46 C47 119.7(4) . . ? 
C48 C47 C46 118.0(4) . . ? 
C49 C48 C47 121.7(4) . . ? 
C48 C49 C50 119.8(4) . . ? 
C49 C50 C51 120.0(4) . . ? 
C46 C51 C50 119.8(3) . . ? 
N4 C52 C46 175.7(6) . . ? 
C54 C53 C55 124.4(6) . 5_666 ? 
C53 C54 C55 115.9(6) . . ? 
C53 C55 C56 123.9(3) 5_666 . ? 
C53 C55 C54 119.7(5) 5_666 . ? 
C56 C55 C54 116.4(3) . . ? 
C58 C57 C58 142.5(11) 2_756 . ? 
C58 C57 C62 24.3(5) 2_756 2_756 ? 
C58 C57 C62 118.1(9) . 2_756 ? 
C58 C57 C62 118.1(9) 2_756 . ? 
C58 C57 C62 24.3(5) . . ? 
C62 C57 C62 93.8(10) 2_756 . ? 
C62 C58 C60 40.9(14) . . ? 
C62 C58 C57 78.1(16) . . ? 
C60 C58 C57 118.7(10) . . ? 
C60 C59 C59 141.9(6) . 2_756 ? 
C60 C59 C61 69.9(7) . . ? 
C59 C59 C61 147.4(5) 2_756 . ? 
C60 C59 C62 38.8(6) . . ? 
C59 C59 C62 103.4(4) 2_756 . ? 
C61 C59 C62 107.0(6) . . ? 
C62 C60 C59 94.0(12) . . ? 
C62 C60 C58 23.7(8) . . ? 
C59 C60 C58 117.7(11) . . ? 
C62 C60 C61 154.0(13) . . ? 
C59 C60 C61 66.5(7) . . ? 
C58 C60 C61 163.3(9) . . ? 
C59 C61 C60 43.6(5) . . ? 
C58 C62 C60 115(2) . . ? 
C58 C62 C57 77.5(16) . . ? 
C60 C62 C57 165.7(12) . . ? 
C58 C62 C59 162.7(19) . . ? 
C60 C62 C59 47.2(8) . . ? 
C57 C62 C59 119.7(8) . . ? 
 
_diffrn_measured_fraction_theta_max    0.935 
_diffrn_reflns_theta_full              'ACTA 50' 
_diffrn_measured_fraction_theta_full   'ACTA 50' 
_refine_diff_density_max    1.142 
_refine_diff_density_min   -1.296 
_refine_diff_density_rms    0.096 
